# Supplementary material
Source: publisher figshare collection journal article supplement (https://gsajournals.figshare.com/articles/dataset/_/14442668)
Supplement: Supplementary file 3 [file 1]

**Bandyopadhyay, Douglass, et al.  
Figure S6.**

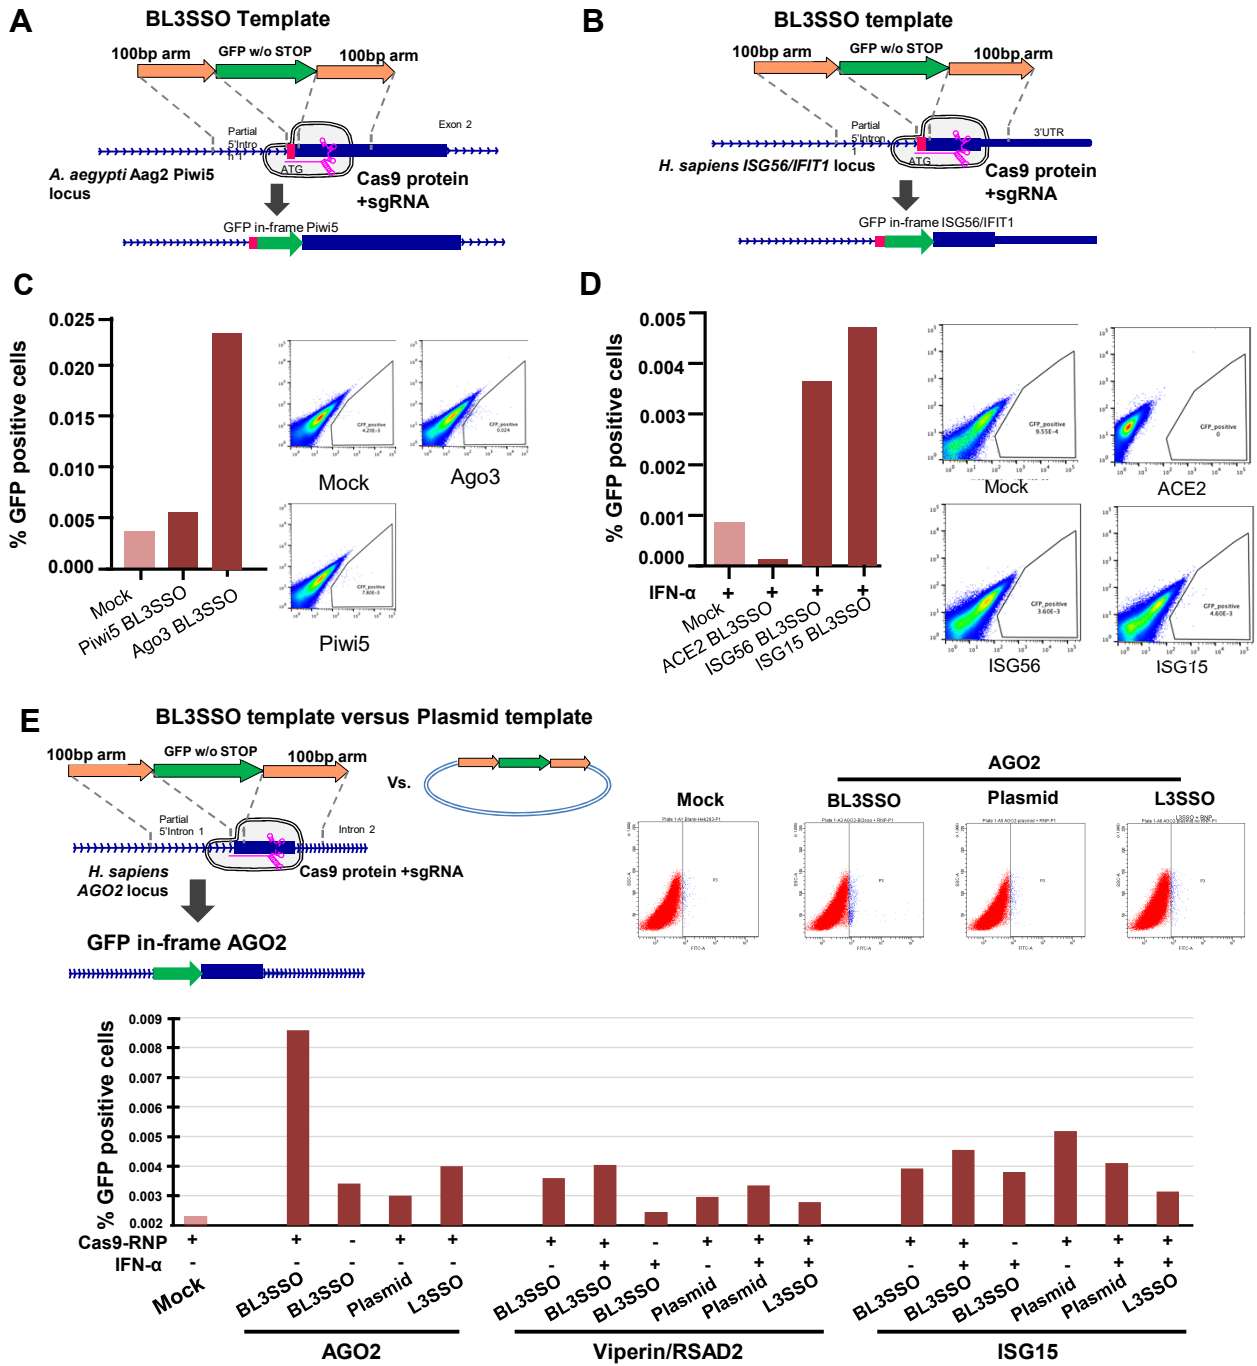

**Figure S6. Comparing BL3SSO template efficiency at other genomic loci.**

Schematics of GFP BL3SSO to target: A) the *Piwi5* gene locus in *Aedes aegypti* mosquito Aag2 cells, and B) the *ISG56/IFIT1* locus in human cells. Flow cytometry analysis of GFP positive cells after transfection of BL3SSO constructs and Cas9/sgrRNA RNPs targeting C) the *Piwi5* and *Ago3* loci in Aag2 cells, and D) *ISG15*, *ISG56* and *ACE2* loci in HEK293 cells. E) Direct comparison of BL3SSO to L3SSO and plasmids that contain the cloned L3SSO sequence in Cas9 directed HDR at human *AGO2*, *Viperin*, and *ISG15* loci. Schematic shows targeting to the second exon of *AGO2*, four flow cytometry plots as examples, and the quantitation of GFP-positive cells across the samples in the bar graph below.
